1 **Horseshoe crab genomes reveal the evolutionary fates of genes and microRNAs after**  
2 **three rounds (3R) of whole genome duplication**

3 Wenyan Nong<sup>1,^</sup>, Zhe Qu<sup>1,^</sup>, Yiqian Li<sup>1,^</sup>, Tom Barton-Owen<sup>1,^</sup>, Annette Y.P. Wong<sup>1,^</sup>, Ho  
4 Yin Yip<sup>1</sup>, Hoi Ting Lee<sup>1</sup>, Satya Narayana<sup>1</sup>, Tobias Baril<sup>2</sup>, Thomas Swale<sup>3</sup>, Jianquan Cao<sup>1</sup>,  
5 Ting Fung Chan<sup>4</sup>, Hoi Shan Kwan<sup>5</sup>, Ngai Sai Ming<sup>4</sup>, Gianni Panagiotou<sup>6,16</sup>, Pei-Yuan Qian<sup>7</sup>,  
6 Jian-Wen Qiu<sup>8</sup>, Kevin Y. Yip<sup>9</sup>, Noraznawati Ismail<sup>10</sup>, Siddhartha Pati<sup>11, 17, 18</sup>, Akbar John<sup>12</sup>,  
7 Stephen S. Tobe<sup>13</sup>, William G. Bendena<sup>14</sup>, Siu Gin Cheung<sup>15</sup>, Alexander Hayward<sup>2</sup>, Jerome  
8 H.L. Hui<sup>1,\*</sup>

9

10 1. School of Life Sciences, Simon F.S. Li Marine Science Laboratory, State Key Laboratory of  
11 Agrobiotechnology, The Chinese University of Hong Kong, China

12 2. University of Exeter, United Kingdom

13 3. Dovetail Genomics, United States of America

14 4. State Key Laboratory of Agrobiotechnology, School of Life Sciences, The Chinese University of Hong Kong,  
15 China

16 5. School of Life Sciences, The Chinese University of Hong Kong, China

17 6. School of Biological Sciences, The University of Hong Kong, China

18 7. Department of Ocean Science and Hong Kong Branch of Southern Marine Science and Engineering  
19 Guangdong Laboratory (Guangzhou), Hong Kong University of Science and Technology, China

20 8. Department of Biology, Hong Kong Baptist University, China

21 9. Department of Computer Science and Engineering, The Chinese University of Hong Kong, Hong Kong

22 10. Institute of Marine Biotechnology, Universiti Malaysia Terengganu, Malaysia

23 11. Department of Bioscience and Biotechnology, Fakir Mohan University, Balasore, India

24 12. Institute of Oceanography and Maritime Studies (INOCEM), Kulliyah of Science, International Islamic  
25 University, Malaysia

26 13. Department of Cell and Systems Biology, University of Toronto, Canada

27 14. Department of Biology, Queen's University, Canada

28 15. Department of Chemistry, City University of Hong Kong, China

29 16. Leibniz Institute of Natural Product Research and Infection Biology – Hans Knöll Institute. Jena, Germany

30 17. Institute of Tropical Biodiversity and Sustainable Development, University Malaysia Terengganu, 20130  
31 Kuala Nerus, Terengganu, Malaysia

32 18. Research Division, Association for Biodiversity Conservation and Research (ABC), Odisha- 756003, India.

33

34 ^ equal contribution, \* corresponding author = jeromehui@cuhk.edu.hk

35

## 1 **Abstract**

2 Whole genome duplication (WGD) has occurred in relatively few sexually reproducing  
3 invertebrates. Consequently, the WGD that occurred in the common ancestor of horseshoe  
4 crabs ~135 million years ago provides a rare opportunity to decipher the evolutionary  
5 consequences of a duplicated invertebrate genome. Here, we present a high-quality genome  
6 assembly for the mangrove horseshoe crab *Carcinoscorpius rotundicauda* (1.7Gb, N50 =  
7 90.2Mb, with 89.8% sequences anchored to 16 pseudomolecules,  $2n = 32$ ), and a  
8 resequenced genome of the tri-spine horseshoe crab *Tachypleus tridentatus* (1.7Gb, N50 =  
9 109.7Mb). Analyses of gene families, microRNAs, and synteny show that horseshoe crabs  
10 have undergone three rounds (3R) of WGD, and that these WGD events are shared with  
11 spiders. Comparison of the genomes of *C. rotundicauda* and *T. tridentatus* populations from  
12 several geographic locations further elucidates the diverse fates of both coding and noncoding  
13 genes. Together, the present study represents a cornerstone for a better understanding of the  
14 consequences of invertebrate WGD events on evolutionary fates of genes and microRNAs at  
15 individual and population levels, and highlights the genetic diversity with practical values for  
16 breeding programs and conservation of horseshoe crabs.

17

## 18 **Key words**

19 Whole genome duplication, arthropods, chelicerates, homeobox genes, microRNAs,  
20 population genomics

21

22

23

24

25

26

27

## 1 **Background**

2 Polyploidy provides new genetic raw material for evolutionary diversification, as  
3 gene duplication can lead to the evolution of new gene functions and regulatory networks  
4 (Holland 2003). Nevertheless, whole genome duplication (WGD) is a relatively rare  
5 occurrence in animals when compared to the fungi and plants (Van de Peer et al 2017). In  
6 animals, two rounds of ancient WGD occurred in the last common ancestor of the vertebrates,  
7 with additional rounds in some teleost fish lineages (Semon and Wolfe 2007; Jaillon et al  
8 2009; Van de Peer et al 2017). Fixation of WGD or polyploidization has been considered a  
9 major force in shaping the evolutionarily success of vertebrate lineages by making  
10 fundamental changes in physiology and morphology, leading to the origin of new adaptations  
11 (Van de Peet et al 2009; Moriyama and Koshiha-Takeuchi 2018). Meanwhile, among the  
12 invertebrates, horseshoe crabs (Nossa et al 2014; Kenny et al 2016), spiders and scorpions  
13 (Schwager et al 2017) represent the only sexually reproducing invertebrate lineages that are  
14 known to have undergone WGD (Figure 1A).

15 Horseshoe crabs are considered to be ‘living fossils’, with the oldest fossils dated  
16 from the Ordovician period (~450 million years ago (Mya), Rudkin and Young 2009).  
17 However, despite this long history, there are only four extant species of horseshoe crabs  
18 worldwide: the Atlantic horseshoe crab (*Limulus polyphemus*) from the Atlantic East Coast of  
19 North America, and the mangrove horseshoe crab (*Carcinoscorpius rotundicauda*), the Indo-  
20 Pacific horseshoe crab (*Tachypleus gigas*), and the tri-spine horseshoe crab (*Tachypleus*  
21 *tridentatus*), from South and East Asia (John et al 2018). All extant horseshoe crabs are  
22 estimated to have diverged from a common ancestor that existed ~135 Mya (Obst et al 2012),  
23 and they share an ancestral WGD (Kenny et al 2016). A high-quality genome assembly was  
24 recently announced as a genomic resource for *T. tridentatus* (Gong et al 2019; Liao et al  
25 2019), leaving an exciting research opportunity to analyse the genomes of other horseshoe  
26 crab species to understand how WGD reshapes the genome and rewires genetic regulatory  
27 network in invertebrates.

28 In the present study, we provide the first high quality genome of the mangrove  
29 horseshoe crab (*C. rotundicauda*), and a resequenced genome of tri-spine horseshoe crab (*T.*  
30 *tridentatus*). Importantly, we present evidence for the number of rounds of WGD that have  
31 occurred in these genomes, and investigate if these represent a shared event with spiders. We  
32 also examine the evolutionary fate of genes and microRNAs at both the individual and

1 population level in these genomes. Collectively, this study highlights the evolutionary  
2 consequences of a unique invertebrate WGD, while also providing detailed genetic insights  
3 which will also be useful for various genomic, biomedical, and conservation measures.

4

## 5 **Results and Discussion**

### 6 **High-quality genomes of two horseshoe crabs**

7 Genomic DNA was extracted from single individuals of two species of horseshoe crab,  
8 *C. rotundicauda* and *T. tridentatus* (Figure 1B), and sequenced using Illumina short-read,  
9 10X Genomics linked-read, and PacBio long-read sequencing platforms (Supplementary  
10 information S1, Table 1.1.1-1.1.2). Hi-C libraries were also constructed for both species  
11 sequenced using the Illumina platform (Supplementary information S1, Figure S1.1.1-1.1.2).  
12 For the final genome assemblies, both genomes were first assembled using short-reads,  
13 followed by scaffolding with Hi-C data. The *C. rotundicauda* genome assembly is 1.72 Gb  
14 with a scaffold N50 of 90.2 Mb (Figure 1C). The high physical contiguity of the genome is  
15 matched by high completeness, with 93.8% complete BUSCO core eukaryotic genes (Figure  
16 1C). The *T. tridentatus* genome is 1.72 Gb with a scaffold N50 of 109.7 Mb and 93.7 %  
17 BUSCO completeness (Figure 1C). In total, the *C. rotundicauda* and *T. tridentatus* genome  
18 assemblies include 34,354 and 42,906 gene models, respectively. Furthermore, 89.8% of the  
19 sequences assembled for *C. rotundicauda* genome are contained on just 16 pseudomolecules,  
20 consistent with a near chromosome-level assembly (chromosome  $2n=32$ , Iswasaki et al 1988,  
21 Supplementary information S1, Table 1.1.3).

22 To date, the only repeat data available for horseshoe crabs are two independent  
23 analyses of the tri-spine horseshoe crab *T. tridentatus*, which identified a repeat content of  
24 34.61% (Gong et al 2019), and 39.96% (Liao et al 2019). In the present study, we provide the  
25 first analysis of repeat content in the genomes of different horseshoe crab species, by  
26 analysing repeats in our genome assembly for *T. tridentatus*, as well as our assembly for the  
27 mangrove horseshoe crab, *C. rotunicauda*. We find that repeat content is similar in both  
28 genomes, occupying approximately one third of total genomic content. Specifically, we  
29 identify a total repeat content of 32.99% for *T. tridentatus* and 35.01% for *C. rotunicauda*, of  
30 which the dominant repeats are DNA elements, followed by LINEs, with SINEs and LTR

1 elements contributing just a small proportion of total repeat content (Figure 1D,  
2 Supplementary information S1, Table 1.2.1).

3 A large proportion of eukaryotic genomes is typically composed of repetitive DNA,  
4 and repeats are widely cited as being one of the key determinants of genome size (Chénais et  
5 al 2012). However, while the genome size for both species of horseshoe crab sequenced here  
6 is comparatively large for invertebrates, their repeat content is not unusually high (*C.*  
7 *rotundicauda*: 35.02%, *T. tridentatus*: 32.98%, Figure 1D, Supplementary information S1,  
8 Table 1.2.1). Instead, the comparatively large size of horseshoe crab genomes appears to be a  
9 consequence of multiple rounds of WGD, as discussed in greater detail below.

10 In the *C. rotundicauda* genome, repeats are evenly distributed across genic and  
11 intergenic regions (Figure 1D). However, in the *T. tridentatus* genome, a greater proportion  
12 of repeats are found in genic regions, due primarily to a higher density of DNA elements and  
13 LINES, as well as unclassified elements (Figure 1D). Repeat landscape plots (Figure 1D)  
14 suggest a relatively similar pattern of historical transposable element activity for both  
15 horseshoe crab species. Recent activity appears to have tapered off more quickly in the *T.*  
16 *tridentatus* genome, particularly with respect to LTR elements and certain DNA elements  
17 (Figure 1D).

### 18 **Three rounds (3R) of whole genome duplications in horseshoe crabs**

19 Initial efforts to analyse WGD in extant horseshoe crabs were from low-depth and  
20 genotyping-by-sequencing which hindered the understanding of WGD in these taxa (Nossa et  
21 al 2014; Kenny et al 2016). Recently, there have been two resequencing efforts for the  
22 horseshoe crab *T. tridentatus* (Gong et al 2019; Liao et al 2019), but our *T. tridentatus*  
23 genome assembly has the largest contig N50 (Figure 1C). Furthermore, our assembly for *C.*  
24 *rotundicauda* represents the first close to chromosomal-level genome assembly for this  
25 species. Consequently, the two high-quality horseshoe crab genomes presented in this study  
26 provide us with an unprecedented opportunity to address the issue of invertebrate WGD and  
27 its evolutionary consequences.

28 An important outstanding question is how many rounds of WGD occurred in the last  
29 common ancestor of horseshoe crabs, or alternatively if all rounds of WGD had occurred  
30 already in the ancestor of arachnids and horseshoe crabs (Figure 1A)? To address this

1 question, we first investigated the number and genomic location of Hox cluster genes, which  
2 have played the role of a “Rosetta stone” for understanding animal evolution (Holland 2017).  
3 For example, the genome of the cephalochordate amphioxus contains only a single Hox gene  
4 cluster with 15 Hox genes, while the mouse genome contains four Hox gene clusters with 39  
5 Hox genes, providing evidence that two rounds of WGD occurred between the most recent  
6 common ancestor of amphioxus and human (Putnam et al 2008; Holland 2013). In our  
7 horseshoe crab genomes for *C. rotundicauda* and *T. tridentatus*, the number of Hox genes  
8 was found to be 43 and 36, respectively (Figure 2A, Supplementary information S2). In *C.*  
9 *rotundicauda*, we found there are five Hox clusters, with other Hox genes located on  
10 additional small scaffolds; while in *T. tridentatus*, there are three Hox clusters, again with  
11 other Hox genes scattered across different scaffolds (Figure 2A). The situation is similar to  
12 the genome assembly of *L. polyphemus* (Nossa et al 2014), where our analyses showed that  
13 there are four Hox clusters with additional Hox genes located on different scaffolds. In a  
14 recent study of the *T. tridentatus* re-sequenced genome, the authors could only find two Hox  
15 clusters and could not identify the *Ftz* gene inside these clusters (Gong et al 2019). On  
16 contrary, our results suggested that there are three Hox clusters (including *Ftz*), and thus more  
17 than one round of WGD occurred in the lineage leading to extant horseshoe crabs.

18 We then investigated the sister cluster of the Hox genes - the ParaHox cluster genes,  
19 which are also highly clustered in bilaterians (Brooke et al 1998; Hui et al 2009; 2012).  
20 Similar to the Hox cluster genes, the invertebrate amphioxus contains only a single ParaHox  
21 gene cluster in its genome, while the ParaHox cluster genes are located on four chromosomes  
22 in human (Putnam et al 2008). In comparison, both the horseshoe crab genomes for *C.*  
23 *rotundicauda* and *T. tridentatus* contain two ParaHox clusters, composed of *Gsx* and *Cdx*,  
24 with other ParaHox genes located on three scaffolds. Meanwhile, in the genome assembly of  
25 *L. polyphemus* (Nossa et al 2014), perhaps due to the lower sequence continuity of the  
26 genome (i.e. low scaffold N50), only a single ParaHox cluster for *Cdx* was identified, with  
27 the other ParaHox genes were located on eight additional scaffolds (Figure 2A). In the  
28 situations relating to other well-known homeobox gene clusters, including the NK cluster and  
29 SINE clusters, as above, multiple clusters were revealed (Figure 2B-C). In *C. rotundicauda*  
30 and *T. tridentatus*, five and seven SINE clusters are found respectively, while in the genome  
31 assembly of *L. polyphemus* (Nossa et al 2014), four SINE clusters were revealed, with the  
32 other six genes located elsewhere in the genome.

1           Using genome-wide analyses of homeobox gene content in three horseshoe crab  
2 genomes, we find that many homeobox genes are present in more than 4 copies (Figure 2D,  
3 details are shown in Supplementary information S1, Table 1.2.2, Figure S1.2.1-1.2.5). These  
4 results suggest that at least two rounds (2R), and likely three rounds (3R) of WGD have  
5 occurred. The question then becomes, how many rounds of WGD have occurred. To address  
6 this question, we further carried out genome-wide synteny analyses to shed further light on  
7 the situation. As shown in Figure 3A, using a default of a minimum of 7 genes to define a  
8 syntenic block, most of the chromosomes of *C. rotundicauda* exhibit synteny with on other  
9 chromosomes, with most of them have a number between 4-8 (including its own copy). Thus,  
10 we propose that a 3R WGD occurred in the horseshoe crab.

11

## 12 **Shared or independent duplications with spider?**

13           Another major unresolved question relating to horseshoe crab genomes is whether the  
14 reported cases of WGD in chelicerates constitute shared or independent events. Gene family  
15 analyses of spider and scorpion genomes have suggested that an ancient WGD is shared  
16 between them, independent of the WGDs that occurred in horseshoe crabs (Schwager et al  
17 2017). Using the two horseshoe crab genome assemblies generated here, we tackled this  
18 important question from two different perspectives: (i) we performed analyses of synteny as  
19 a more rigorous examination of the question, and, (ii) we reconsidered recent evidence on  
20 phylogenetic relationships within the Chelicerata.

21           We first carried out the syntenic analyses between the Hox scaffolds of *C.*  
22 *rotundicauda* and the published spider and scorpion genomes (Schwager et al 2017) (Figure  
23 3B). Despite no clear shared duplication event between *C. rotundicauda* and spider Hox,  
24 surprisingly, we observed syntenic relationships between two Hox scaffolds when using a  
25 minimum of 5 genes to define a syntenic block (Figure 3B). Similarly, in the syntenic  
26 comparison of Hox scaffolds of *T. tridentatus* and the published spider and scorpion genomes,  
27 we could observe syntenic relationships between two different Hox scaffolds when using a  
28 minimum of 5 genes to define a syntenic block (Figure 3B). In a less stringent condition of  
29 using a minimum of 2 genes to define a syntenic block, we additionally observed syntenic  
30 relationships between two other Hox scaffolds between *T. tridentatus* and spider (Figure 3B).



1 Our data, suggested for the first time, that the WGD in horseshoe crab is a shared event with  
2 the WGD in spider and scorpion.

3 An important consideration necessary to fully understand WGD events identified  
4 from horseshoe crab genomes are the phylogenetic relationships between these animals.  
5 Horseshoe crabs have long been regarded as a monophyletic group (Xiphosura) and the sister  
6 group to the terrestrial chelicerate clade that includes spiders and scorpions (Arachnida).  
7 However, in a recent phylogenetic analysis using publicly available data, including three  
8 xiphosurans, two pycnogonids, and 34 arachnids, it has been suggested that the horseshoe  
9 crabs represent a group of marine arachnids (Ballesteros and Sharma 2019). On the other  
10 hand, another group of researchers recovered the Xiphosura as the sister group to the  
11 Arachnida (Lorano-Fernandez et al 2019), suggesting a single terrestrialisation event  
12 occurred after the last common ancestor of arachnids and horseshoe crabs diverged. Despite  
13 our data not being able to differentiate between these scenarios, we considered both situations  
14 while evaluating our data. In the Ballesteros and Sharma's phylogeny, a shared WGD event  
15 occurred at the common ancestor of horseshoe crabs, spiders, and scorpions. On the other  
16 hand, the Loranzo-Fernandez et al phylogeny suggests that after the ancestral WGD at the  
17 ancestor of chelicerates and xiphosurans, massive gene losses may have happened in some  
18 lineages such as ticks and mites.

19

## 20 **Duplicated fates of noncoding microRNAs**

21 With the availability of new transcriptomic data, especially the first small RNA  
22 transcriptomic data for both species of horseshoe crabs (Supplementary information 1, Table  
23 1.1.5-1.1.6), we analysed the evolutionary consequences of small noncoding RNAs after the  
24 WGD events in both *C. rotundicauda* and *T. tridentatus*. To reveal if duplicated microRNAs  
25 can also provide insights into the number of rounds of WGD, we first examined the number  
26 of paralogues for the bilaterian conserved set of 57 microRNAs, across three horseshoe crab  
27 genomes (Figure 4A). Of these microRNAs, 27 and 33 have more than 4 copies in *T.*  
28 *tridentatus* and *C. rotundicauda* respectively (Figure 4A). These data further support the  
29 hypothesis that 3R WGD occurred in the horseshoe crabs.



1 To understand the fates of microRNA paralogues, we first analysed the sequence  
2 conservation/divergence of 41 conserved microRNA families and 4 chelicerate-specific  
3 microRNAs by aligning their sequences (Supplementary information S1, Figure S1.2.10). We  
4 found that the paralogues always have more sequence conservation in one arm (rather than  
5 showing similar conservation for both arms across paralogues) after WGD (Supplementary  
6 information S1, Figure S1.2.10). An example is illustrated for the microRNA bantam, where  
7 the sequence of the 5p arm is less conserved than the 3p arm between paralogues (Figure  
8 4Ba).

9 To explore whether the more conserved microRNA arm correlates with expression  
10 level, we mapped small RNA reads to different paralogues. By eliminating microRNA  
11 species which have different arm usage between their paralogues or between horseshoe crab  
12 species, we found that, out of the 29 assessed microRNAs, 26 show a higher expression  
13 level/dominant arm usage at the conserved arm (Figure 4Bb, Supplementary information S3).  
14 For example, the 3p arm shows more sequence conservation between the bantam paralogues  
15 in horseshoe crabs, and their 3p arms also show higher expression levels than their 5p arms  
16 (Figure 4Bb, Supplementary information S3). The 26 conserved microRNAs identified as  
17 showing higher expression levels for the conserved arm serve as the first example correlating  
18 expression level and conservation of mature microRNA sequences in paralogues following  
19 WGD.

20 In addition to relatively old conserved microRNAs, we also investigated new/novel  
21 microRNAs which are specific to a certain horseshoe crab species, to understand the impact  
22 of WGD on these. A total of 12 novel microRNAs were identified and conserved between *C.*  
23 *rotundicauda* and *T. tridentatus* (Supplementary information S1, Figure S1.2.10). The  
24 identified novel microRNAs are highly conserved in sequences between orthologues than  
25 paralogues, an example is shown in Figure 4Bc, suggesting these horseshoe crab-specific  
26 novel microRNAs are born at the horseshoe crab ancestor after WGD.

27 In the common house spider *Parasteatoda tepidariorum* which is believed to have  
28 undergone a single round of WGD (Schwager et al 2017), paralogues of microRNAs were  
29 found to exhibit arm switching, a phenomenon whereby dominant microRNA arm usage is  
30 swapped among different tissues, developmental stages or species (Griffiths-Jones et al 2011;  
31 Leite et al 2016). We investigated microRNA arm switching in the sRNA transcriptomes  
32 generated here and compared this to their orthologues in various arthropods including fruitfly

1 (*Drosophila melanogaster*), mosquito (*Aedes aegypti*), butterfly (*Heliconius melpomene*),  
2 beetle (*Tribolium castaneum*), water flea (*Daphnia pulex*), and tick (*Ixodes scapulari*)  
3 (Kozomara and Griffiths-Jones 2014; Fromm et al. 2020). By comparing dominant arm usage  
4 across different species, we found that many microRNAs, such as miR-2788, miR-281 and  
5 miR-iab-8 have undergone microRNA arm switching (Figure 4C, Supplementary information  
6 S3). Moreover, we also observed microRNA arm switching in cases of microRNAs  
7 throughout different developmental time or tissues (Figure 4D, Supplementary information  
8 S3). These findings are congruent with the spider microRNA study (Schwager et al 2017,  
9 Leite et al 2016).

10 In summary, the first investigation of microRNAs in horseshoe crabs provide another  
11 dimension for understanding the fates of duplicated noncoding microRNAs in invertebrates.

12

### 13 **WGD at population level**

14 Another question that remains poorly explored is the evolutionary consequences of  
15 WGD on gene duplicates at the population level. Individuals of both *C. rotundicauda* and *T.*  
16 *tridentatus* were collected from different locations across Asia and subjected to genome  
17 sequencing (Figure 5A, Supplementary information S1, Table 1.2.3-1.2.4). As these genomes  
18 have undergone WGD, to confidently reveal their population structure, we only mapped  
19 sequencing reads to the mitochondrial genome and constructed the evolutionary trees from  
20 mitochondrial data. Distinct subpopulations can be identified within different regions in Asia,  
21 for example, the populations from Hong Kong formed a distinct group from other locations in  
22 Asia, which may be due to the strong ocean currents that had prevented the gene flows  
23 between these locations (Figure 5B; Supplementary information S1, Figure S1.2.6-1.2.7).

24 Taking advantage of these population genomic data, we further asked the question of  
25 how dynamic the mutations at paralogues are in different individuals. With a focus on the  
26 homeodomain of the homeobox genes, we called single-nucleotide polymorphisms (SNPs) at  
27 the homeodomains of all annotated homeobox genes and found confident cases of both non-  
28 synonymous substitutions as well as pseudogenisation in the homeodomain of certain  
29 populations (Figure 5C; Supplementary information S4).

1           In *T. tridentatus*, non-synonymous substitutions at the homeodomain of Six3/6-like  
2 and Onecut-E genes were revealed in certain individuals from Malaysia populations (Figure  
3 5Ca-b). Similarly for *C. rotundiculata*, non-synonymous substitutions at the homeodomain of  
4 the *En-D* gene were also revealed in some individuals from populations in Thailand (Figure  
5 5Cc). This is the first evidence showing that different gene duplicates after WGD in  
6 invertebrates are under different rates of mutation and selection at the individual level.

7           Importantly, unique pseudogenisation was discovered in the paralogue of *Unpg* in  
8 many individuals in the *C. rotundicauda* population located in Hong Kong (Figure 5D). In 9  
9 out of the 10 individuals captured in Hong Kong for sequencing, we found that there is an  
10 alternative form (ALT), with a deletion in *Unpg-A1* (Figure 5D). Given that homeodomains  
11 are standardised as transcription factors with a sequence length of ~60-63 amino acids  
12 (Holland 2013), the deletion suggests that in these individuals these genes are in the process  
13 of becoming pseudogenes. This is the first evidence demonstrating the ongoing and dynamic  
14 mutation rate of paralogues at population level after WGD in invertebrates.

15

## 16 **Conclusion**

17 WGD remains an understudied area, particularly in invertebrates such as the horseshoe crabs,  
18 despite its considerable importance in animal evolution. This study provides evidence of the  
19 3R WGD events in horseshoe crabs, and sheds light on the evolutionary fates of genes and  
20 microRNAs at both the individual and population levels, as well as highlighting the genetic  
21 diversity of these amazing animals, with importance for understanding their evolution,  
22 genomics, and practical value for breeding programs and conservation.

23

## 24 **Materials and methods**

### 25 **DNA, mRNA and sRNA extraction and sequencing**

26           Genomic DNA of the horseshoe crabs *C. rotundicauda* and *T. tridentatus* was isolated  
27 from the leg muscle of a single individual in each case, using the PureLink Genomic DNA  
28 Kit (Invitrogen). In addition, different tissues were dissected and homogenized in Trizol  
29 reagent (Invitrogen), and total RNA was isolated following the manufacturers' instructions.

1 Blood samples of both species of horseshoe crab were drawn by syringe and directly  
2 transferred into Trizol reagent for RNA extraction. For egg, 1<sup>st</sup>, 2<sup>nd</sup> and 3<sup>rd</sup> instars of *T.*  
3 *tridentatus*, whole individuals were used for RNA extraction. Extracted gDNA was subject to  
4 quality control using gel electrophoresis. Qualified samples were sent to Novogene and  
5 Dovetail Genomics for library preparation and sequencing. In addition, a Chicago library was  
6 prepared by Dovetail Genomics using the method described by Putnam et al (2016). Briefly,  
7 ~500ng of high molecular weight gDNA (mean fragment length = 55 kb) was reconstituted  
8 into artificial chromatin *in vitro* and fixed with formaldehyde. Fixed chromatin was digested  
9 with DpnII, the 5' overhangs filled in with biotinylated nucleotides, and free blunt ends were  
10 ligated. After ligation, crosslinks were reversed, and the DNA purified. Purified DNA was  
11 treated to remove biotin that was not internal to ligated fragments. The DNA was then  
12 sheared to ~350 bp mean fragment size and sequencing libraries were generated using  
13 NEBNext Ultra enzymes and Illumina-compatible adapters. Biotin-containing fragments  
14 were isolated using streptavidin beads before PCR enrichment of each library. The libraries  
15 were sequenced on the Illumina HiSeq X platform. Dovetail HiC libraries were prepared as  
16 described previously (Lieberman-Aiden et al 2009). Briefly, for each library, chromatin was  
17 fixed with formaldehyde in the nucleus and then extracted Fixed chromatin was digested with  
18 DpnII, the 5' overhangs filled in with biotinylated nucleotides, and free blunt ends were  
19 ligated. After ligation, crosslinks were reversed and the DNA purified. Purified DNA was  
20 treated to remove biotin that was not internal to ligated fragments. The DNA was then  
21 sheared to ~350 bp mean fragment size and sequencing libraries were generated using  
22 NEBNext Ultra enzymes and Illumina-compatible adapters. Biotin-containing fragments  
23 were isolated using streptavidin beads before PCR enrichment of each library. Details of the  
24 sequencing data can be found in Supplementary information S1, Table 1.1.1-1.1.2.

25 Total RNA was subject to quality control using a Nanodrop spectrophotometer  
26 (Thermo Scientific), gel electrophoresis, and analysis using the Agilent 2100 Bioanalyzer  
27 (Agilent RNA 6000 Nano Kit). High quality samples underwent library construction and  
28 sequencing at Novogene; polyA-selected RNA-Sequencing libraries were prepared using  
29 TruSeq RNA Sample Prep Kit v2. Insert sizes and the concentration of final libraries were  
30 determined using an Agilent 2100 bioanalyzer instrument (Agilent DNA 1000 Reagents) and  
31 real-time quantitative PCR (TaqMan Probe) respectively. Small RNA (<200 nt) was isolated  
32 using the mirVana miRNA isolation kit (Ambion) according to the manufacturer's  
33 instructions. Small RNA was dissolved in the elution buffer provided in the mirVana miRNA

1 isolation kit (Thermo Fisher Scientific) and submitted to Novogene for HiSeq Small RNA  
2 library construction and 50 bp single-end (SE) sequencing. Detailed information for the  
3 sequencing data can be found in Supplementary information S1, Table 1.1.5-1.1.6.

4

## 5 **Genome, mRNA transcriptome, and sRNA assembly and annotation**

6 To process the Illumina sequencing data, adapters were trimmed and reads were  
7 filtered using the following parameters “-n 0.1 (i.e. removal if N accounted for 10% or more  
8 of reads) -l 4 -q 0.5 (i.e. removal if the quality value is lower than 4 and accounts for 50% or  
9 more of reads)”. FastQC was run for quality control (Andrew 2010). If adapter contamination  
10 was identified, adapter sequences were removed using minion (Davis et al. 2013). Adapter  
11 trimming and quality trimming was then performed with cutadapt v1.10 (Martin 2011). For  
12 each species, k-mers of the Illumina PE library of 500 bp insert size were counted using DSK  
13 version 2.1.0 with k=25 (Rizk et al. 2013), and estimation of genome size, repeat content, and  
14 heterozygosity were analysed based on a k-mer-based statistical approach using the  
15 GenomeScope webtool (Vurture et al. 2017). Kraken was used to estimate the percentage of  
16 reads that may result from contamination from bacteria (Wood and Salzberg 2014).  
17 Chromium WGS reads were separately used to make a *de novo* assembly using Supernova (v  
18 2.1.1), with the parameter “--maxreads=231545066” for *C. rotundicauda*, and “--  
19 maxreads=100000000” for *T. tridentatus*, respectively. The *de novo* assembly, shotgun reads,  
20 Chicago library reads, and Dovetail HiC library reads were used as input data for HiRise, a  
21 software pipeline designed for using proximity ligation data to scaffold genome assemblies  
22 (Putnam et al, 2016). An iterative analysis was conducted. First, Shotgun and Chicago library  
23 sequences were aligned to the draft input assembly using a modified SNAP read mapper  
24 (<http://snap.cs.berkeley.edu>). The separation of Chicago read pairs mapped within draft  
25 scaffolds was analysed by HiRise to produce a likelihood model for genomic distance  
26 between read pairs, and the model was used to identify and break putative misjoins, to score  
27 prospective joins, and to make joins above a threshold. After aligning and scaffolding  
28 Chicago data, Dovetail HiC library sequences were aligned and scaffolded following the  
29 same method. After scaffolding, shotgun sequences were used to close gaps between contigs.

30 Raw sequencing reads of the transcriptomes were pre-processed with quality trimmed  
31 by trimmomatic (version 0.33, with parameters "ILLUMINACLIP:TruSeq3-PE.fa:2:30:10

1 SLIDINGWINDOW:4:5 LEADING:5 TRAILING:5 MINLEN:25", Bolger et al. 2014). For  
2 the nuclear genomes, the genome sequences were cleaned and masked by Funannotate  
3 (v1.6.0, <https://github.com/nextgenusfs/funannotate>) (Palmer and Stajich 2018), the  
4 softmasked assembly were used to run "funannotate train" with parameters "--stranded RF --  
5 max\_intronlen 350000" to align RNA-seq data, ran Trinity, and then ran PASA (Haas et al  
6 2008). The PASA gene models were used to train Augustus in "funannotate predict" step  
7 following manufacturers recommended options for eukaryotic genomes  
8 ([https://funannotate.readthedocs.io/en/latest/tutorials.html#non-fungal-genomes-higher-](https://funannotate.readthedocs.io/en/latest/tutorials.html#non-fungal-genomes-higher-eukaryotes)  
9 eukaryotes). Briefly, the gene models were predicted by funannotate predict with parameters  
10 "--repeats2evm --protein\_evidence uniprot\_sprot.fasta --genemark\_mode ET --  
11 busco\_seed\_species arthropoda --optimize\_augustus --busco\_db arthropoda --organism other  
12 --max\_intronlen 350000", the gene models predicted by several prediction sources including  
13 GeneMark (Lomsadze et al 2005), high-quality Augustus predictions (HiQ), PASA (Haas et  
14 al 2008), Augustus (Stanke et al 2006), GlimmerHMM (Majoros et al, 2003) and snap (Korf  
15 2004) were passed to Evidence Modeler (Haas et al 2008) (EVM Weights: {'GeneMark': 1,  
16 'HiQ': 2, 'pasa': 6, 'proteins': 1, 'Augustus': 1, 'GlimmerHMM': 1, 'snap': 1, 'transcripts': 1})  
17 and generated the final annotation files, and then used of PASA (Haas et al 2008) to update  
18 the EVM consensus predictions, added UTR annotations and models for alternatively spliced  
19 isoforms. The protein-coding genes which cannot hit to nr db by DIAMOND blastp (version  
20 v0.9.22.123) (Buchfink B et al 2015) with evaluate 1e-5 were removed.

21 To process small RNA data, we removed small RNA sequencing raw reads with  
22 Phred quality score less than 20, and adaptor sequences were trimmed. Processed reads of  
23 length 18bp to 27bp were then mapped to their respective horseshoe crab genome and  
24 analyzed using the mirDeep2 package (Friedlander et al 2011). To identify conserved  
25 microRNAs, the predicted horseshoe crab microRNA hairpins were compared against  
26 metazoan microRNA precursor sequences from miRBase (Kozomara and Griffiths-Jones  
27 2014) using BLASTn (e value 0.01) (Altschul et al 1990). Predicted microRNAs which did  
28 not have significant sequence similarity to any of the microRNAs in miRBase were manually  
29 examined. Novel microRNAs were defined only when they fulfilled the unique features of  
30 microRNAs (Fromm et al 2020, MirGeneDB 2.0 <https://mirgenedb.org/information>). In  
31 addition, the copy number of microRNA loci was examined by using microRNA hairpins  
32 confirmed above to BLAST against each horseshoe crab genome.



1

## 2 **Annotation of repetitive elements**

3         Repetitive elements were identified using an in-house pipeline. Firstly, elements were  
4 identified using RepeatMasker ver. 4.0.8 (Smit et al 2013) with the *Arthropoda* RepBase  
5 (Jurka et al 2005) repeat library. Low-complexity repeats were ignored (-nolow) and a  
6 sensitive (-s) search was performed. Following this, a *de novo* repeat library was constructed  
7 using RepeatModeler ver. 1.0.11 (Smit et al 2015), including RECON ver. 1.08 (Bao et al  
8 2002) and RepeatScout ver. 1.0.5 (Price et al 2005). Novel repeats identified by  
9 RepeatModeler were analysed with a 'BLAST, Extract, Extend' process to characterise  
10 elements along their entire length (Platt et al 2016). Consensus sequences and classification  
11 information for each repeat family were generated. The resulting *de novo* repeat library was  
12 utilised to identify repetitive elements using RepeatMasker. Repetitive element association  
13 with genomic features were determined using BedTools ver. 2.26.0 (Quinlan et al 2010).  
14 "Genic" repetitive elements were defined as those overlapping loci annotated as genes  $\pm$  2kb  
15 and identified using the BedTools window function. All plots were generated using Rstudio  
16 ver. 1.2.1335 with R ver. 3.5.1 (Team 2013) and ggplot2 ver. 3.2.1 (Wickham 2016).

17

## 18 **Annotation of gene families and phylogenetic analyses**

19         Potential gene family sequences were first retrieved from the two genomes using  
20 tBLASTn (Altschul et al 1990). Identity of each putatively identified gene was then tested by  
21 comparison to sequences in the NCBI nr database using BLASTx. For homeobox gene  
22 retrieval, sequences were also analysed using the BLAST function in HomeoDB. For  
23 phylogenetic analyses of gene families, DNA sequences were translated into amino acid  
24 sequences and aligned to other members of the gene family; gapped sites were removed from  
25 alignments and phylogenetic trees were constructed using MEGA.

26

## 27 **Synteny analyses**

28         Synteny blocks were computed using SyMAP v4.2 (Synteny Mapping and Analysis  
29 Program) with default parameters except Min Dots from 2 to 7 (Minimum number of anchors  
30 required to define a syntenic block = 2-7) and "mask\_all\_but\_genes = 1" to mask non-genic  
31 sequence (Soderlund et al 2011).



1

## 2 **Population genomic analyses**

3       After quality control using FastQC (Andrews 2010), adaptors and low-quality bases  
4 were removed from the read ends using FASTP (Chen et al. 2018) with "--  
5 qualified\_quality\_phred 30 --length\_required 25" and other default parameters, followed by a  
6 second round of quality control using FastQC. The trimmed reads were mapped to the  
7 unmasked mitochondrion genome (NC\_012574 of *T. tridentatus* and NC\_019623 of *C.*  
8 *rotundicauda*) using bwa (version 0.7.12-r1039) with default parameters. The mapped reads  
9 were sorted using SortSam of picard, and duplicated reads were removed using  
10 MarkDuplicates of picard. HaplotypeCaller from the Genome Analysis Toolkit GATK  
11 (version 4, <https://gatk.broadinstitute.org/hc/en-us>) was used to estimate the general variant  
12 calling file for each individual, and then combined by GenotypeGVCFs to a single variant  
13 calling file. Hard filtering of the SNP calls was carried out with Fisher strand bias (FS > 60.0),  
14 mapping quality MQ < 40.0, and thresholding by sequencing coverage based on minimum  
15 coverage (DP < 100) and maximum coverage (DP > 1,500). The SNPs were annotated with  
16 SnpEff (version 4.3T, <http://snpeff.sourceforge.net/index.html>)(Cingolani et al. 2012).

17       Filtered SNPs were used to generate population tree. The model-based software  
18 program STRUCTURE Version 2.3.4. 81 was used for population analysis. To determine  
19 most appropriate k value, burn-in Markov Chain Monte Carlo (MCMC) replication was set to  
20 50,000 and data were collected over 1,00,000 MCMC replications in each run. Two  
21 independent runs were performed setting the number of population (k) from 2 to 10 using a  
22 model allowing for admixture and correlated allele frequencies. The basis of this kind of  
23 clustering method is the allocation of individual samples to k clusters. The k value was  
24 determined based on the rate of change in LnP(D) between successive k, stability of grouping  
25 pattern across two run and sample information about the material in supplementary file S1.  
26 Evolutionary divergence of within and between four different location horseshoe crab  
27 samples was performed using MEGA 7 (Molecular Evolutionary genetic analysis) following  
28 maximum composite likelihood model with 1000 bootstrap iterations of all samples. Principal  
29 coordinate analysis (PCoA) and UPGMA phylogenetic analysis was conducted to further  
30 assess the population subdivisions. PCoA was performed based on distance matrix using  
31 DARwin V.6.0.21 and UPGMA tree was constructed based on the simple matching  
32 dissimilarity (DARwin).

1 Trimmed reads were mapped to the homeodomain sequences using bwa (version  
2 0.7.12-r1039) with default parameters. The mapped reads were sorted using SortSam of  
3 picard, and duplicated reads were removed using MarkDuplicates of picard. HaplotypeCaller  
4 from the Genome Analysis Toolkit GATK (version 4, <https://gatk.broadinstitute.org/hc/en-us>)  
5 was used to estimate the general variant calling file for each individual, and then combined  
6 by GenotypeGVCFs to a single variant calling file. Hard filtering of the SNP calls was  
7 carried out with Fisher strand bias ( $FS > 60.0$ ), mapping quality ( $MQ < 40.0$ ), QualByDepth  
8 ( $QD < 2.0$ ), MappingQualityRankSumTest ( $MQRankSum < -12.5$ ), ReadPosRankSumTest  
9 ( $ReadPosRankSum < -8.0$ ) as  
10 [https://gatkforums.broadinstitute.org/gatk/discussion/2806/howto-apply-hard-filters-to-a-call-](https://gatkforums.broadinstitute.org/gatk/discussion/2806/howto-apply-hard-filters-to-a-call-set)  
11 [set](https://gatkforums.broadinstitute.org/gatk/discussion/2806/howto-apply-hard-filters-to-a-call-set). The filtered out SNPs were then annotated with SnpEff (version 4.3T,  
12 <http://snpeff.sourceforge.net/index.html>)(Cingolani et al. 2012). The missense mutation of the  
13 homeobox domain were manually checked with samtools tview.

14

#### 15 **MicroRNA arm switching detection**

16 The expression levels of 5p and 3p arms of microRNAs in the horseshoe crabs were  
17 calculated based on the number of sequencing reads mapped to the respective arm region in  
18 the predicted microRNA hairpin using bowtie/mirDeep2. The expression of different arms of  
19 microRNAs from different species were mapped according to previous method (Marco et al  
20 2010) or referred to the data from MirGeneDB 2.0 (Fromm et al 2020). The arm usage ratio  
21 (AUR) of each microRNA was calculated using the formula  $AUR = 5p/(5p+3p)$ , where 5p  
22 and 3p refer to the read counts of predicted 5p and 3p arms respectively. The AUR ranged  
23 from 0 to 1, with smaller values indicating the tendency of 3p preference and larger values  
24 indicating the tendency of 5p preference. 5p and 3p dominance was defined where  $AUR > 0.7$   
25 and  $< 0.3$  respectively. No arm preference was defined when AUR ranged from 0.3 to 0.7.  
26 The overall arm preference (OAP) of each horseshoe crab microRNA was defined by  
27 evaluating their arm dominance in multiple tissue samples. If more than 70% of all tissue  
28 samples showed one type of arm dominance, then this type of arm dominance was defined as  
29 the OAP of this microRNA. Otherwise, no OAP was defined.

30

#### 31 **List of abbreviations**

1 3R: three rounds; WGD: whole genome duplication; AUR: arm usage ratio; OAP: overall  
2 arm preference

3

#### 4 **Acknowledgements**

5 The authors thank Peter Holland for discussion, B. Desany for helping with the assembly of  
6 10X Genomics data, and F. Cheung, R. Leung, W. Tong, W. Yiu, and H. Yu for collection of  
7 some of the RNA. This research was supported by the Hong Kong Research Grant Council  
8 GRF Grant 14103516; Environment and Conservation Fund Project 28/2017; Agriculture,  
9 Fisheries and Conservation Department of HKSAR Government, and the School of Life  
10 Sciences of The Chinese University of Hong Kong (JHLH).

11

#### 12 **References**

13 Altschul SF, Gish W, Miller W, Myers EW, Lipman DJ. 1990. Basic local alignment search  
14 tool. *J. Mol. Biol.* 215:403–410.

15 Andrews S. 2010. FastQC: a quality control tool for high throughput sequence data.

16 Ballesteros JA, Sharma PP. 2019. A Critical Appraisal of the Placement of Xiphosura  
17 (Chelicerata) with Account of Known Sources of Phylogenetic Error. *Syst. Biol.* 68:896–917.

18 Bao Z, Eddy SR. 2002. Automated De Novo Identification of Repeat Sequence Families in  
19 Sequenced Genomes. *Genome Res.* 12:1269–1276.

20 Bolger AM, Lohse M, Usadel B. 2014. Trimmomatic: a flexible trimmer for Illumina  
21 sequence data. *Bioinformatics* 30:2114–2120.

22 Brooke NM, Garcia-Fernández J, Holland PWH. 1998. The ParaHox gene cluster is an  
23 evolutionary sister of the Hox gene cluster. *Nature* 392:920–922.

24 Buchfink B, Xie C, Huson DH. 2014. Fast and sensitive protein alignment using DIAMOND.  
25 *Nat. Methods* 2014 12:59–60.

26 Chen S, Zhou Y, Chen Y, Gu J. 2018. fastp: an ultra-fast all-in-one FASTQ preprocessor.  
27 *Bioinformatics* 34:i884–i890.

- 1 Chénais B, Caruso A, Hiard S, Casse N. 2012. The impact of transposable elements on  
2 eukaryotic genomes: From genome size increase to genetic adaptation to stressful  
3 environments. *Gene* 509:7–15.
- 4 Cingolani P, Platts A, Wang LL, Coon M, Nguyen T, Wang L, Land SJ, Lu X, Ruden DM.  
5 2012. A program for annotating and predicting the effects of single nucleotide  
6 polymorphisms, SnpEff: SNPs in the genome of *Drosophila melanogaster* strain w1118; iso-2;  
7 iso-3. *Fly (Austin)*. 6:80–92.
- 8 Davis MPA, vanDongen S, Abreu-Goodger C, Bartonicek N, Enright AJ. 2013. Kraken: A  
9 set of tools for quality control and analysis of high-throughput sequence data. *Methods*  
10 63:41–49.
- 11 Lieberman-Aiden E, VanBerkum NL, Williams L, Imakaev M, Ragozy T, Telling A, Amit I,  
12 Lajoie BR, Sabo PJ, Dorschner MO, et al. 2009. Comprehensive mapping of long-range  
13 interactions reveals folding principles of the human genome. *Science* 326:289–293.
- 14 Friedländer MR, Mackowiak SD, Li N, Chen W, Rajewsky N. 2012. miRDeep2 accurately  
15 identifies known and hundreds of novel microRNA genes in seven animal clades. *Nucleic  
16 Acids Res.* 40:37–52.
- 17 Fromm B, Domanska D, Høyve E, Ovchinnikov V, Kang W, Aparicio-Puerta E, Johansen M,  
18 Flatmark K, Mathelier A, Hovig E, et al. 2020. MirGeneDB 2.0: the metazoan microRNA  
19 complement. *Nucleic Acids Res.* 48:D132–D141.
- 20 Gong L, Fan G, Ren Y, Chen Y, Qiu Q, Liu L, Qin Y, Liu B, Jiang L, Li H, et al. 2019.  
21 Chromosomal level reference genome of *Tachypleus tridentatus* provides insights into  
22 evolution and adaptation of horseshoe crabs. *Mol. Ecol. Resour.* 19:744–756.
- 23 Griffiths-Jones S, Hui JHL, Marco A, Ronshaugen M. 2011. MicroRNA evolution by arm  
24 switching. *EMBO Rep.* 12:172–177.
- 25 Haas BJ, Salzberg SL, Zhu W, Pertea M, Allen JE, Orvis J, White O, Robin CR, Wortman JR.  
26 2008. Automated eukaryotic gene structure annotation using EVIDENCEModeler and the  
27 Program to Assemble Spliced Alignments. *Genome Biol.* 9(1):R7.
- 28 Holland PWH. 2003. More genes in vertebrates? *J. Struct. Func. Genom.* 3: 75–84.

- 1 Holland PWH. 2013. Evolution of homeobox genes. *Rev. Dev. Biol.* 2(1):31–45.
- 2 Holland PWH. 2017. The dawn of amphioxus molecular biology - a personal perspective. *Int.*  
3 *J. Dev. Biol.* 61:585–590.
- 4 Hui JH, Raible F, Korchagina N, Dray N, Samain S, Magdelenat G, Jubin C, Segurens B,  
5 Balavoine G, Arendt D, et al. 2009. Features of the ancestral bilaterian inferred from  
6 *Platynereis dumerilii* ParaHox genes. *BMC Biol.* 7:43.
- 7 Hui JHL, McDougall C, Monteiro AS, Holland PWH, Arendt D, Balavoine G, Ferrier DEK.  
8 2012. Extensive Chordate and Annelid Macrosynteny Reveals Ancestral Homeobox Gene  
9 Organization. *Mol. Biol. Evol.* 29:157–165.
- 10 Iwasaki Y, Iwami T, Sekiguchi K. 1988. Karyology. In Sekiguchi K (ed) *Biology of*  
11 *Horseshoe Crabs*, Science House, Inc., Tokyo, pp 309–314.
- 12 Jaillon O, Aury JM, Wincker P. 2009. “Changing by doubling”, the impact of Whole  
13 Genome Duplications in the evolution of eukaryotes. *Comptes. Rendus. Biol.* 332:241–253.
- 14 John AB, Nelson BR, Hasan IS, Cheung SG, Yusli W, Dash BP, Tsuchiya K, Iwasaki Y, Pati  
15 S. 2018. A review on Fisheries and Conservation Status of Asian Horseshoe Crabs. *Biodivers.*  
16 *Conserv.* 29:3573-3598.
- 17 Jurka J, Kapitonov VV, Pavlicek A, Klonowski P, Kohany O, Walichiewicz J. 2005. Repbase  
18 Update, a database of eukaryotic repetitive elements. *Cytogenet. Genome Res.* 110:462–467.
- 19 Kenny NJ, Chan KW, Nong W, Qu Z, Maeso I, Yip HY, Chan TF, Kwan HS, Holland PWH,  
20 Chu KH, Hui JHL 2016. Ancestral whole-genome duplication in the marine chelicerate  
21 horseshoe crabs. *Heredity (Edinb).* 116:190-199.
- 22 Korf I. 2004. Gene finding in novel genomes. *BMC Bioinformatics* 5.
- 23 Kozomara A, Griffiths-Jones S. 2014. MiRBase: Annotating high confidence microRNAs  
24 using deep sequencing data. *Nucleic Acids Res.* 42:D68-D73.
- 25 Leite DJ, Ninova M, Hilbrant M, Arif S, Griffiths-Jones S, Ronshaugen M, McGregor AP.  
26 2016. Pervasive microRNA Duplication in Chelicerates: Insights from the Embryonic

- 1 microRNA Repertoire of the Spider Parasteatoda tepidariorum. *Genome Biol. Evol.* 8:2133–  
2 2144.
- 3 Liao YY, Xu PW, Kwan KY, Ma ZY, Fang HY, Xu JY, Wang PL, Yang SY, Xie SB, Xu SQ,  
4 et al. 2019. Data descriptor: Draft genomic and transcriptome resources for marine  
5 chelicerate *Tachypleus tridentatus*. *Sci. Data* 6:190029.
- 6 Lomsadze A, Ter-Hovhannisyanyan V, Chernoff YO, Borodovsky M. 2005. Gene identification  
7 in novel eukaryotic genomes by self-training algorithm. *Nucleic Acids Res.* 33:6494–6506.
- 8 Lozano-Fernandez J, Tanner AR, Giacomelli M, Carton R, Vinther J, Edgecombe GD, Pisani  
9 D. 2019. Increasing species sampling in chelicerate genomic-scale datasets provides support  
10 for monophyly of Acari and Arachnida. *Nat. Commun.* 10(1):2295.
- 11 Marco A, Hui JHL, Ronshaugen M, Griffiths-Jones S. 2010. Functional Shifts in Insect  
12 microRNA Evolution. *Genome Biol. Evol.* 2:686–696.
- 13 Martin M. 2011. Cutadapt removes adapter sequences from high-throughput sequencing  
14 reads. *EMBnet.journal* 17:3.
- 15 Moriyama Y, Koshiba-Takeuchi K. 2018. Significance of whole-genome duplications on the  
16 emergence of evolutionary novelties. *Brief. Funct. Genomics* 17:329–338.
- 17 Nossa CW, Havlak P, Yue JX, Lv J, Vincent KY, Brockmann HJ, Putnam NH. 2014. Joint  
18 assembly and genetic mapping of the Atlantic horseshoe crab genome reveals ancient whole  
19 genome duplication. *Gigascience* 3:9.
- 20 Obst M, Faurby S, Bussarawit S, Funch P. 2012. Molecular phylogeny of extant horseshoe  
21 crabs (*Xiphosura*, *Limulidae*) indicates Paleogene diversification of Asian species. *Mol.*  
22 *Phylogenet. Evol.* 62:21–26.
- 23 Palmer J, Stajich J. 2018. Funannotate: eukaryotic genome annotation pipeline.
- 24 Platt RN, Blanco-Berdugo L, Ray DA. 2016. Accurate transposable element annotation is  
25 vital when analyzing new genome assemblies. *Genome Biol. Evol.* 8:403–410.

- 1 Putnam NH, Butts T, Ferrier DEK, Furlong RF, Hellsten U, Kawashima T, Robinson-  
2 Rechavi M, Shoguchi E, Terry A, Yu K, et al. 2008. The amphioxus genome and the  
3 evolution of the chordate karyotype. *Nature* 453:1064–1071.
- 4 Putnam NH, Connell BO, Stites JC, Rice BJ, Hartley PD, Sugnet CW, Haussler D, Rokhsar  
5 DS. 2016. Chromosome-scale shotgun assembly using an in vitro method for long-range  
6 linkage. *Genome Res.* 26:342–350.
- 7 Quinlan AR, Hall IM. 2010. BEDTools: a flexible suite of utilities for comparing genomic  
8 features. *Bioinformatics* 26:841-842.
- 9 Rizk G, Lavenier D, Chikhi R. 2013. DSK: K-mer counting with very low memory usage.  
10 *Bioinformatics* 29:652–653.
- 11 Rudkin DM, Young GA. 2009. Horseshoe crabs - An ancient ancestry revealed. In: *Biology  
12 and Conservation of Horseshoe Crabs*. Springer US. p. 25–44.
- 13 Schwager EE, Sharma PP, Clarke T, Leite DJ, Wierschin T, Pechmann M, Akiyama-Oda Y,  
14 Esposito L, Bechsgaard J, Bilde T, et al. 2017. The house spider genome reveals an ancient  
15 whole-genome duplication during arachnid evolution. *BMC Biol.* 15:62.
- 16 Sémon M, Wolfe KH. 2007. Reciprocal gene loss between Tetraodon and zebrafish after  
17 whole genome duplication in their ancestor. *Trends Genet.* 23:108–112.
- 18 Smit AFA, Hubley RR, Green PR. 2013. RepeatMasker Open-4.0. <http://repeatmasker.org>.
- 19 Smit AFA, Hubley R. 2015. RepeatModeler Open-1.0. <http://repeatmasker.org>.
- 20 Soderlund C, Bomhoff M, Nelson WM. 2011. SyMAP v3.4: a turnkey synteny system with  
21 application to plant genomes. *Nucleic Acids Res.* 39:e68.
- 22 Team RC. 2013. R: A language and environment for statistical computing.
- 23 Van de Peer Y, Mizrachi E, Marchal K. 2017. The evolutionary significance of polyploidy.  
24 *Nat. Rev. Genet.* 18:411-424.
- 25 Van de Peer Y, Maere S, Meyer A. 2009. The evolutionary significance of ancient genome  
26 duplications. *Nat. Rev. Genet.* 10:725-732.



1 Vurture GW, Sedlazeck FJ, Nattestad M, Underwood CJ, Fang H, Gurtowski J, Schatz MC.  
2 2017. GenomeScope: Fast reference-free genome profiling from short reads. *Bioinformatics*  
3 33:2202–2204.

4 Wickham H. 2016. *ggplot2: elegant graphics for data analysis*. Springer

5 Wood DE, Salzberg SL. 2014. Kraken: Ultrafast metagenomic sequence classification using  
6 exact alignments. *Genome Biol.* 15:R46.

7

## 8 **Figure legends and Supplementary information**

9 Figure 1. A) Schematic diagram illustrating the current knowledge of whole genome  
10 duplication (WGD) in animals. “?R” denotes unknown rounds of whole genome duplication;  
11 B) Pictures of horseshoe crabs *C. roundiculata* and *T. tridentatus*; C) Summary of genome  
12 assembly statistics of horseshoe crabs; D) Repeat content for the two horseshoe crab genomes,  
13 *C. rotundicauda* and *T. tridentatus*: Pie charts illustrating repeat content as a proportion of  
14 total genomic content; Repeat content present in genic versus intergenic regions; and Repeat  
15 landscape plots illustrating transposable element activity in each horseshoe crab genome.

16

17 Figure 2. A) Genomic organisation of the Hox (left) and ParaHox (right) cluster genes in the  
18 horseshoe crab genomes. B) Genomic organisation of the NK and C) SINE cluster genes in  
19 the horseshoe crab genomes. D) Number of gene copies of homeobox genes in the horseshoe  
20 crab genomes.

21

22 Figure 3. A) Synteny between different chromosomes of *C. roundiculata* and *T. tridentatus*.  
23 Note that the bracketed numbers highlighted in red refer to the numbers of chromosomes that  
24 syntenic blocks with that chromosome (counting include its own copy). B) Synteny  
25 relationships of Hox scaffolds of (Upper panel): *C. roundiculata*, spider and scorpion; (Lower  
26 panel) and *T. tridentatus*, spider, and scorpion.

27

28 Figure 4. A) Number of gene copies of conserved microRNAs in the arthropod genomes. B)  
29 Sequence conservation and arm switching of horseshoe crab microRNAs. a) Degree of  
30 sequence conservation between bantam paralogues; b) Arm sequence conservation in  
31 relations to the dominant expression in between arms; c) Sequence alignment of novel

1 microRNAs between the two horseshoe crabs. C) Comparison of microRNA arm preference  
2 among different arthropod species. Isc: *Ixodes scapularis*, Dpu: *Daphnia pulex*, Tca:  
3 *Tribolium castaneum*, Hme: *Heliconius melpomene*, Aae: *Aedes aegypti*, Dme: *Drosophila*  
4 *melanogaster*. D) MicroRNA arm switching cases among various tissue of Tt. Abbreviation:  
5 Egg- E01 and Egg; 1st, 2nd, 3rd instar- 1st, 2nd, 3rd; Chelicerae- CA1, CJ1; Heart- H01,  
6 HA1, HJ1; 1st pair of leg- LA1, LJ1; 5th pair of leg- LA5, LJ5; Telson- TA1, TJ1; Gonad-  
7 G01; Blood- B01, BA1, BJ1; Brain: BRA; A-adult, J: juvenile. Arm preference: blue- 3p  
8 dominance, red- 5p dominance, yellow- no preference, white- no expression.

9

10 Figure 5. A) Geographical distribution of *C. roundicultata* and *T. tridentatus* collected  
11 samples; B) Phylogenetic trees of the collected samples. C) Non-synonymous substitutions of  
12 *T. tridentatus* (a) Six3/6-like; (b) Onecut-E genes in individuals collected in Malaysia; and (c).  
13 *C. roundiculata* En-D gene in individuals collected in Thailand population. D)  
14 Pseudogenisation of *C. roundiculata* Unpg-A1 gene in individuals collected in Hong Kong  
15 population.

16

17 Supplementary information S1. Supplementary data.

18

19 Supplementary information S2. Information of homeobox gene sequence and genomic  
20 locations.

21

22 Supplementary information S3. MicroRNA contents and arm usage of the two horseshoe  
23 crabs.

24

25 Supplementary information S4. SNPs at the homeodomains of the two horseshoe crabs.

26

27

28

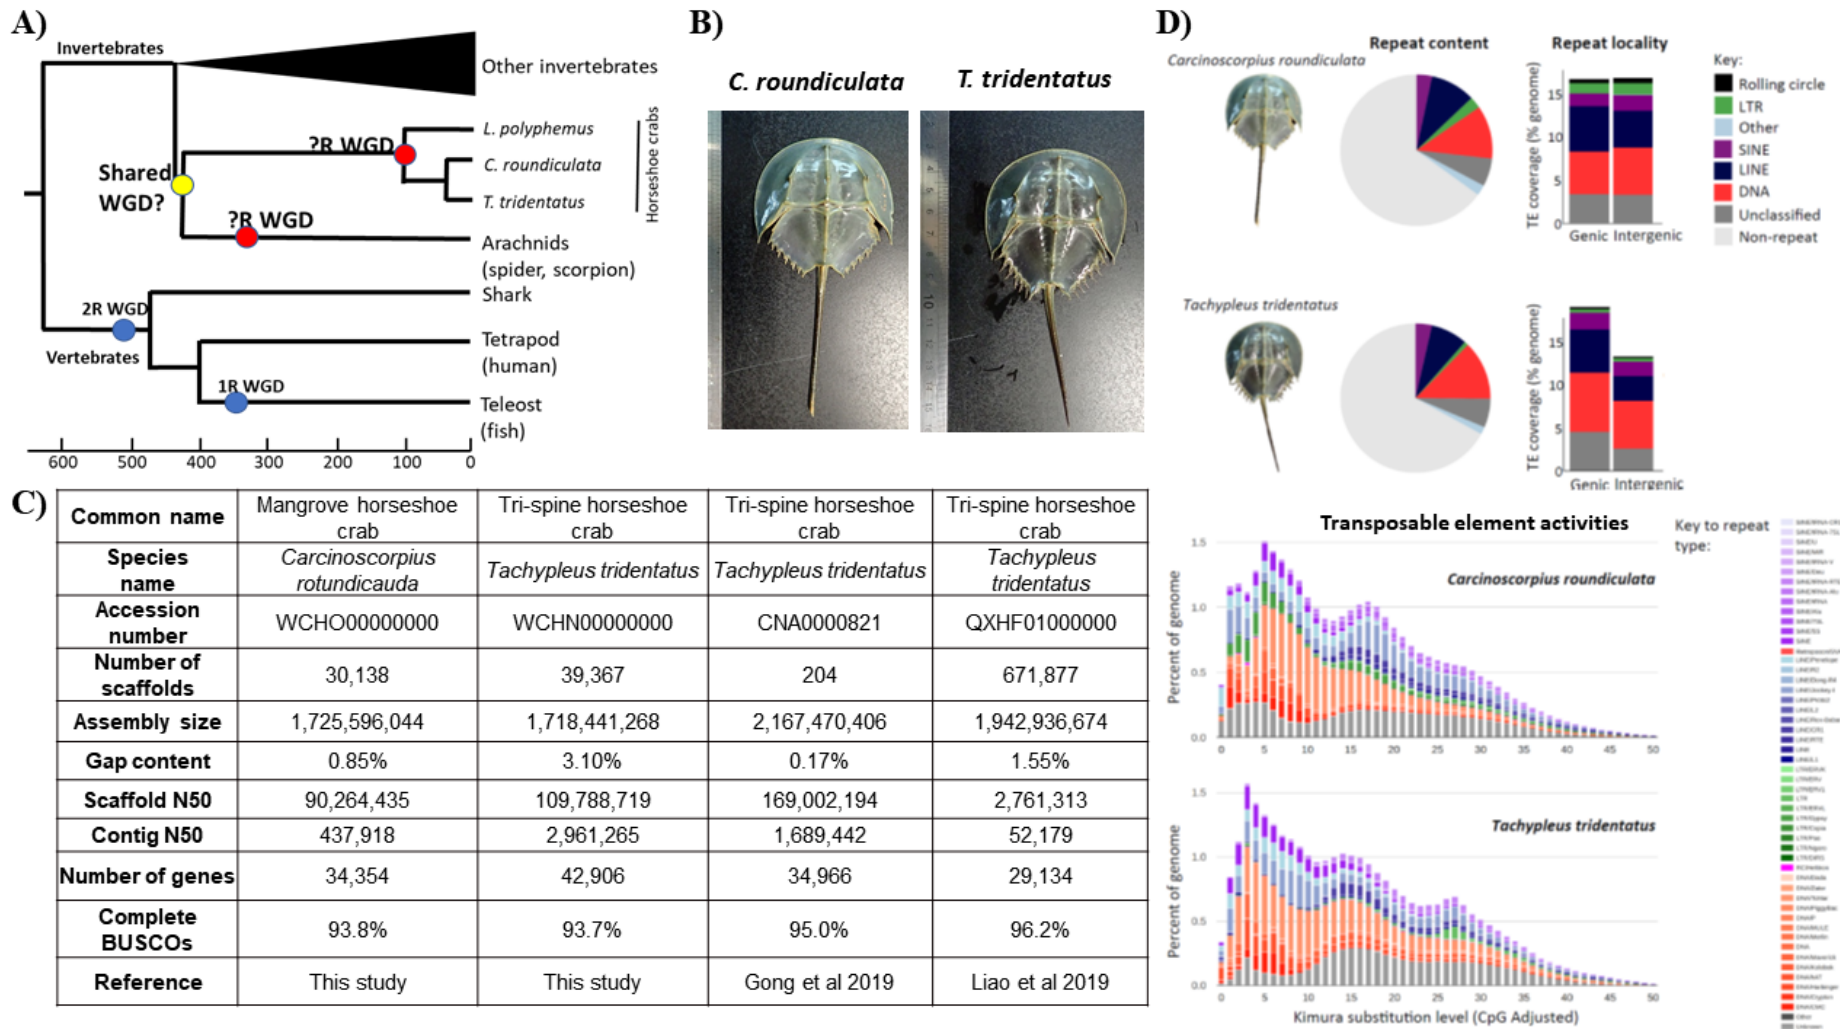

1

2

3 Figure 1



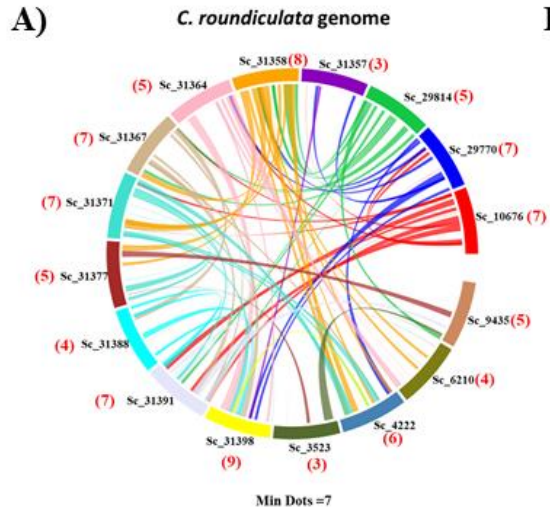

**B) *C. roundiculata* Hox v.s. Spider Hox**

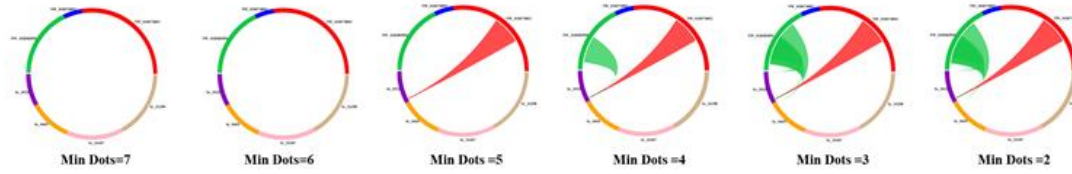

***C. roundiculata* Hox v.s. Scorpion Hox**

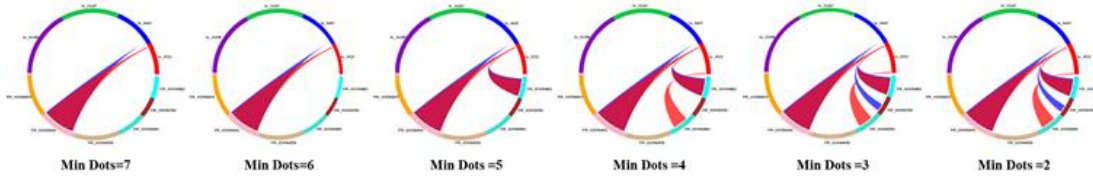

***T. tridentatus* genome**

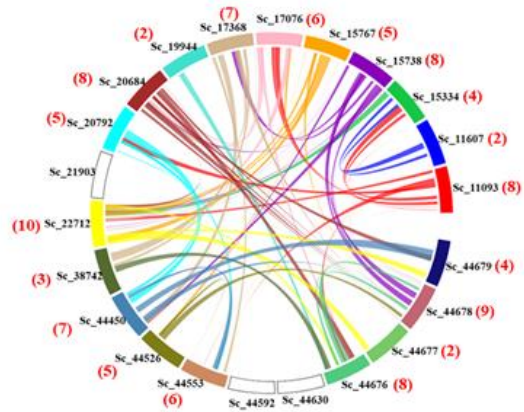

***T. tridentatus* Hox v.s. Spider Hox**

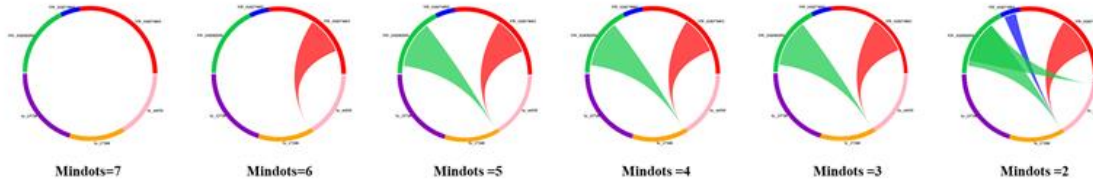

***T. tridentatus* Hox v.s. Scorpion Hox**

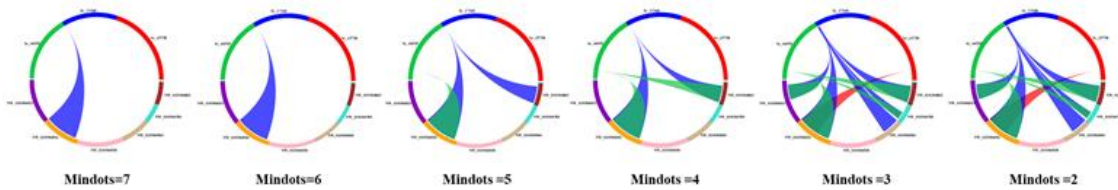

1

2 Figure 3

3



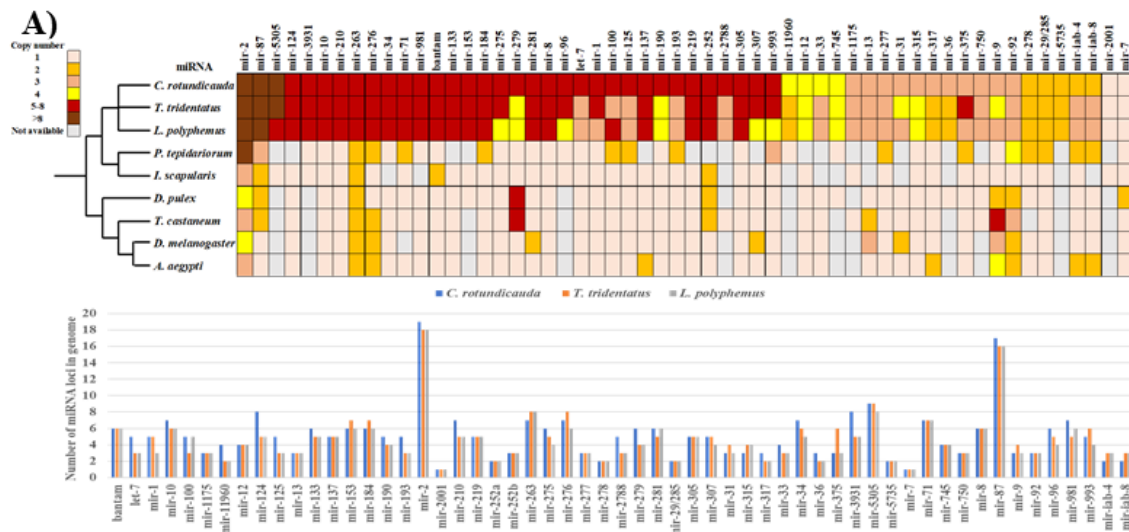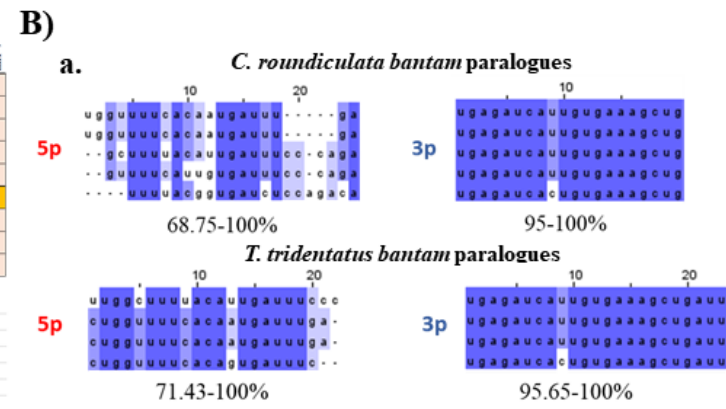

**b.**

| miRNA   | More conserved arm | Dominant arm of Cr miRNA | Dominant arm of Tt miRNA | miRNA      | More conserved arm | Dominant arm of Cr miRNA | Dominant arm of Tt miRNA |
|---------|--------------------|--------------------------|--------------------------|------------|--------------------|--------------------------|--------------------------|
| bantam  | 3p                 |                          |                          | mir-278    | 3p                 |                          |                          |
| let-7   | 5p                 |                          |                          | mir-2788   | Identical          |                          |                          |
| mir-1   | 3p                 |                          |                          | mir-279    | 3p                 |                          |                          |
| mir-12  | 5p                 |                          |                          | mir-292/85 | 5p                 |                          |                          |
| mir-124 | 3p                 |                          |                          | mir-305    | 5p                 |                          |                          |
| mir-125 | 5p                 |                          |                          | mir-315    | 5p                 |                          |                          |
| mir-133 | 3p                 |                          |                          | mir-33     | 5p                 |                          |                          |
| mir-137 | 3p                 |                          |                          | mir-375    | 3p                 |                          |                          |
| mir-184 | 3p                 |                          |                          | mir-3931   | 3p                 |                          |                          |
| mir-190 | 5p                 |                          |                          | mir-750    | 3p                 |                          |                          |
| mir-210 | 3p                 |                          |                          | mir-8      | 3p                 |                          |                          |
| mir-252 | 5p                 |                          |                          | mir-92     | 3p                 |                          |                          |
| mir-263 | 5p                 |                          |                          | mir-96     | 5p                 |                          |                          |
| mir-276 | 3p                 |                          |                          | mir-981    | 3p                 |                          |                          |
|         |                    |                          |                          | mir-1ab-4  | Cr-5p; Tt-3p       |                          |                          |

5p dominance  
3p dominance

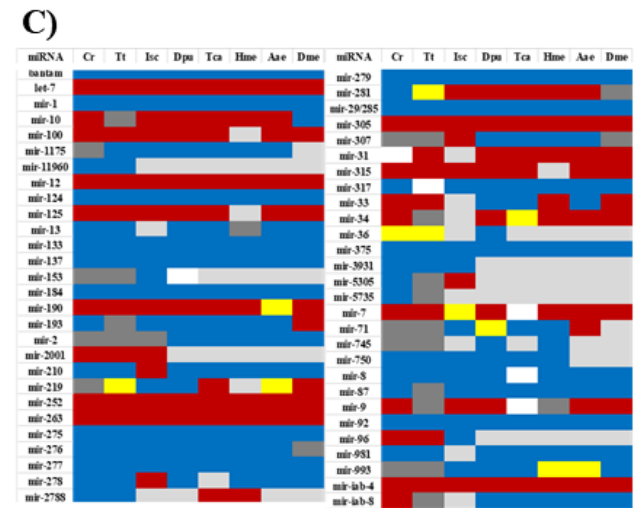

**D)**

| Tt provisional id    | Annotation | E01 | EGG | 1st | 2nd | 3rd | CA1 | CJ1 | HD1 | HAI | HJ1 | LAI | LJ1 | LAS | LJS | TA1 | TAI | GO1 | B01 | BA1 | BJ1 | BRA |  |
|----------------------|------------|-----|-----|-----|-----|-----|-----|-----|-----|-----|-----|-----|-----|-----|-----|-----|-----|-----|-----|-----|-----|-----|--|
| Scaffold_44678_42279 | mir-193    |     |     |     |     |     |     |     |     |     |     |     |     |     |     |     |     |     |     |     |     |     |  |
| Scaffold_44450_33978 | mir-2      |     |     |     |     |     |     |     |     |     |     |     |     |     |     |     |     |     |     |     |     |     |  |
| Scaffold_38742_30762 | mir-2      |     |     |     |     |     |     |     |     |     |     |     |     |     |     |     |     |     |     |     |     |     |  |
| Scaffold_17368_16003 | mir-2      |     |     |     |     |     |     |     |     |     |     |     |     |     |     |     |     |     |     |     |     |     |  |
| Scaffold_20792_23636 | mir-2      |     |     |     |     |     |     |     |     |     |     |     |     |     |     |     |     |     |     |     |     |     |  |
| Scaffold_44553_38599 | mir-281    |     |     |     |     |     |     |     |     |     |     |     |     |     |     |     |     |     |     |     |     |     |  |
| Scaffold_44678_43785 | mir-34     |     |     |     |     |     |     |     |     |     |     |     |     |     |     |     |     |     |     |     |     |     |  |
| Scaffold_15334_7455  | mir-36     |     |     |     |     |     |     |     |     |     |     |     |     |     |     |     |     |     |     |     |     |     |  |
| Scaffold_44678_43508 | mir-5735   |     |     |     |     |     |     |     |     |     |     |     |     |     |     |     |     |     |     |     |     |     |  |
| Scaffold_15767_11852 | mir-7      |     |     |     |     |     |     |     |     |     |     |     |     |     |     |     |     |     |     |     |     |     |  |
| Scaffold_44678_43223 | mir-71     |     |     |     |     |     |     |     |     |     |     |     |     |     |     |     |     |     |     |     |     |     |  |
| Scaffold_44526_35600 | mir-745    |     |     |     |     |     |     |     |     |     |     |     |     |     |     |     |     |     |     |     |     |     |  |
| Scaffold_15334_7887  | mir-87     |     |     |     |     |     |     |     |     |     |     |     |     |     |     |     |     |     |     |     |     |     |  |
| Scaffold_15738_8521  | mir-993    |     |     |     |     |     |     |     |     |     |     |     |     |     |     |     |     |     |     |     |     |     |  |
| Scaffold_17368_18506 | mir-1ab-8  |     |     |     |     |     |     |     |     |     |     |     |     |     |     |     |     |     |     |     |     |     |  |

5p dominance  
3p dominance  
No preference  
No expression data  
Different dominant arm among paralogues  
Not available

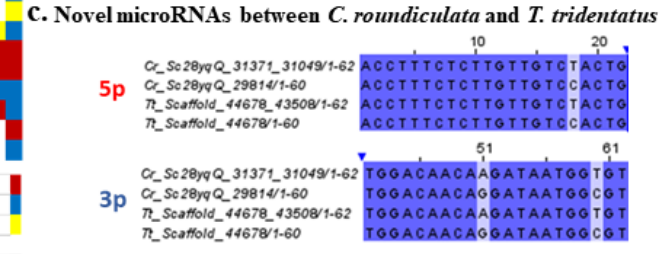

1  
2  
3 Figure 4

A)

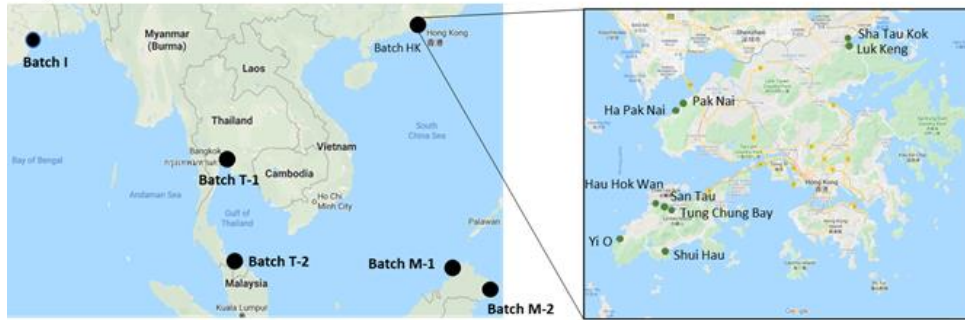

B)

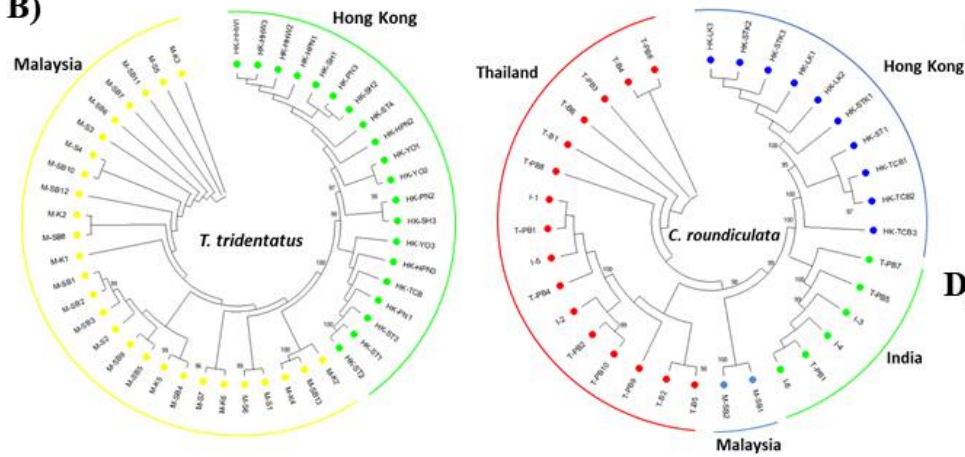

C) a. Non-synonymous substitutions of *T. tridentatus* Six3/6-like in Malaysia population

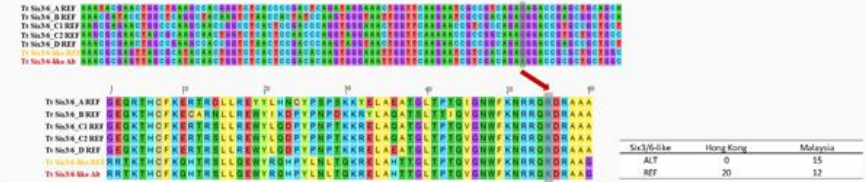

b. Non-synonymous substitutions of *T. tridentatus* Oncut E in Malaysia population

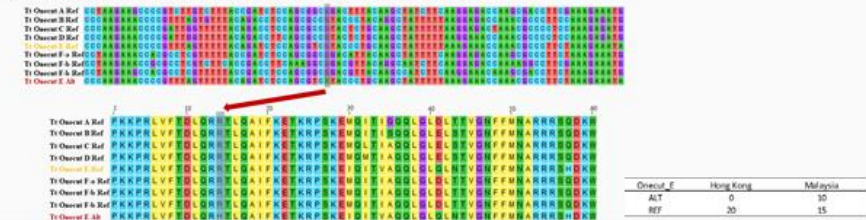

c. Non-synonymous substitutions of *C. roundiculata* Six3/6-like in Thailand population

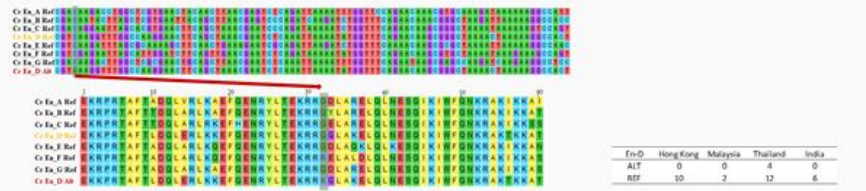

D) Pseudogenisation of *C. roundiculata* Uppq A1 in Hong Kong population

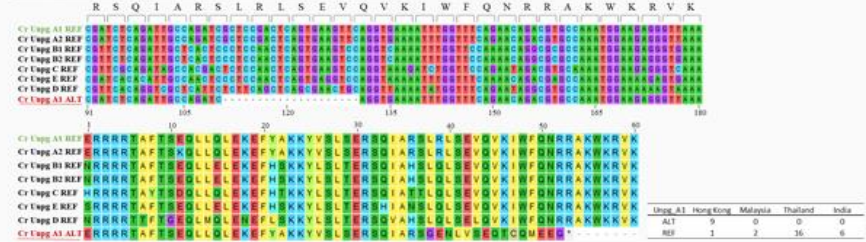

1

2 Figure 5
